# Supplementary material for: Measurement report: Comprehensive Seasonal Study of the Composition and Sources of Submicron Aerosol during the JULIAC Campaign in Germany
Source: Copernicus journal article supplement (doi:10.5194/egusphere-2025-3074), 2025-07-18
Supplement: Supplementary file 1 [file egusphere-2025-3074-supplement.pdf]

# Measurement report: Comprehensive Seasonal Study of the Composition and Sources of Submicron Aerosol during the JULIAC Campaign in Germany

Lu Liu<sup>1,2</sup>, Thorsten Hohaus<sup>1</sup>, Andreas Hofzumahaus<sup>1</sup>, Frank Holland<sup>1</sup>, Hendrik Fuchs<sup>1,3</sup>, Ralf Tillmann<sup>1</sup>, Birger Bohn<sup>1</sup>, Stefanie Andres<sup>1</sup>, Zhaofeng Tan<sup>1, 4</sup>, Franz Rohrer<sup>1</sup>, Vlassis A. Karydis<sup>1</sup>, Vaishali Vardhan<sup>1, 5</sup>, Philipp Franke<sup>1</sup>, Anne C. Lange<sup>1</sup>, Anna Novelli<sup>1</sup>, Benjamin Winter<sup>1</sup>, Changmin Cho<sup>1, 6</sup>, Iulia Gensch<sup>1</sup>, Sergej Wedel<sup>1</sup>, Andreas Wahner<sup>1</sup>, and Astrid Kiendler-Scharr<sup>1, #</sup>

<sup>1</sup> Institute of Climate and Energy Systems, ICE-3: Troposphere, Forschungszentrum Jülich GmbH, Jülich, Germany

<sup>2</sup> Center for Energy and Environmental Sciences, Paul Scherrer Institute, Villigen, Switzerland

<sup>3</sup> Department of Physics, University of Cologne, Cologne, Germany

<sup>4</sup> College of Environmental Sciences and Engineering, Peking University, Beijing, China

<sup>5</sup> Environmental Research Institute, University College Cork, Cork, Ireland

<sup>6</sup> Earth System Science Laboratory, National Center for Atmospheric Research (NCAR), Boulder, USA

<sup>#</sup> deceased

*Correspondence to:* Lu Liu ([lu.liu1@psi.ch](mailto:lu.liu1@psi.ch)), and Thorsten Hohaus ([t.hohaus@fz-juelich.de](mailto:t.hohaus@fz-juelich.de))

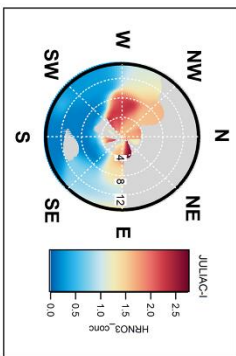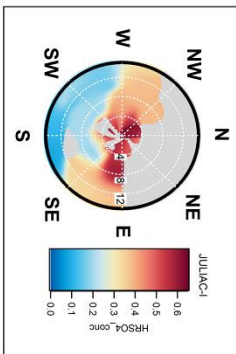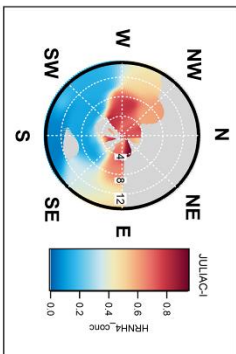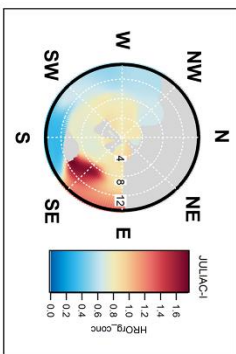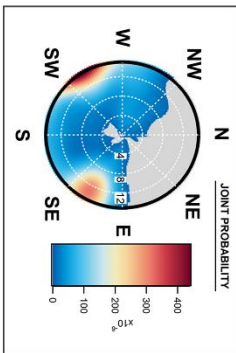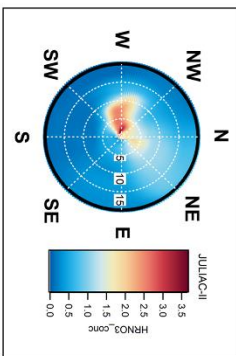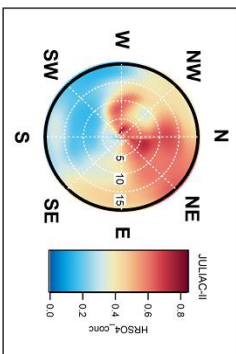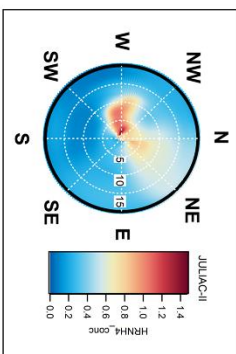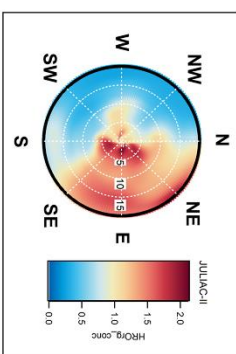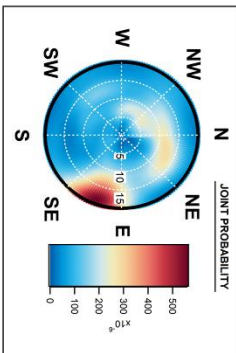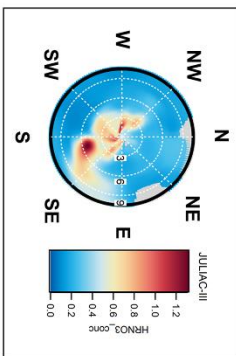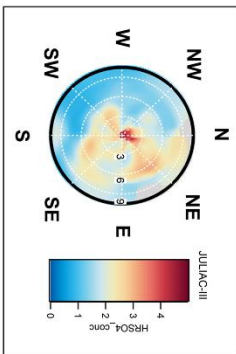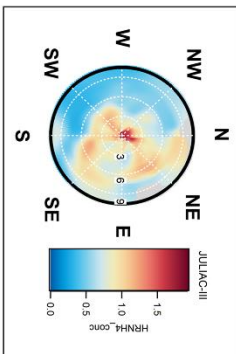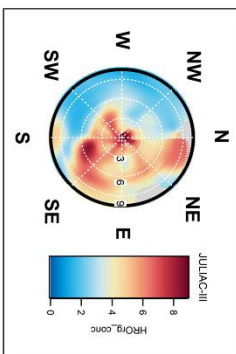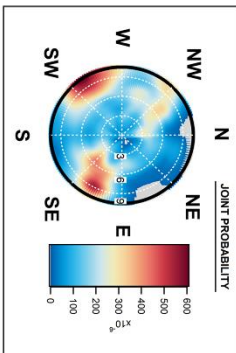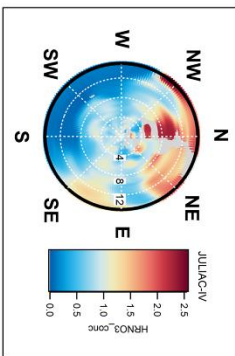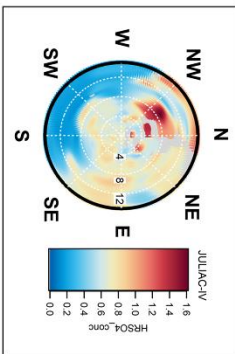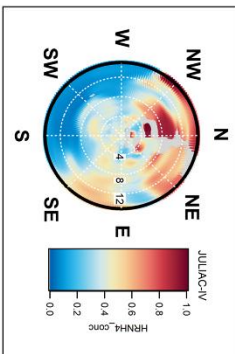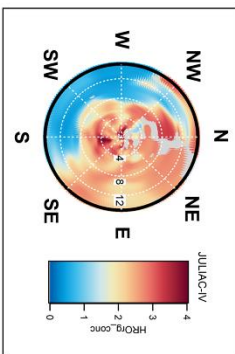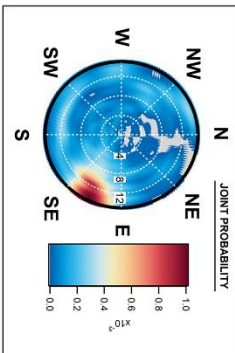

**Figure S1** Polar diagrams using non-parametric wind regressions are shown for all JULIAC-intensive phases, illustrating the bulk concentrations of nitrate, sulfate, ammonium, and organics, as well as the joint probability, which captures the combined influence of wind direction and speed on the presence of all these compounds. The polar plot is based on wind direction and wind speed measured at a height of 50 meters. The concentrations of major submicron aerosol components are represented using color coding in the polar plot to indicate their potential regional influences.

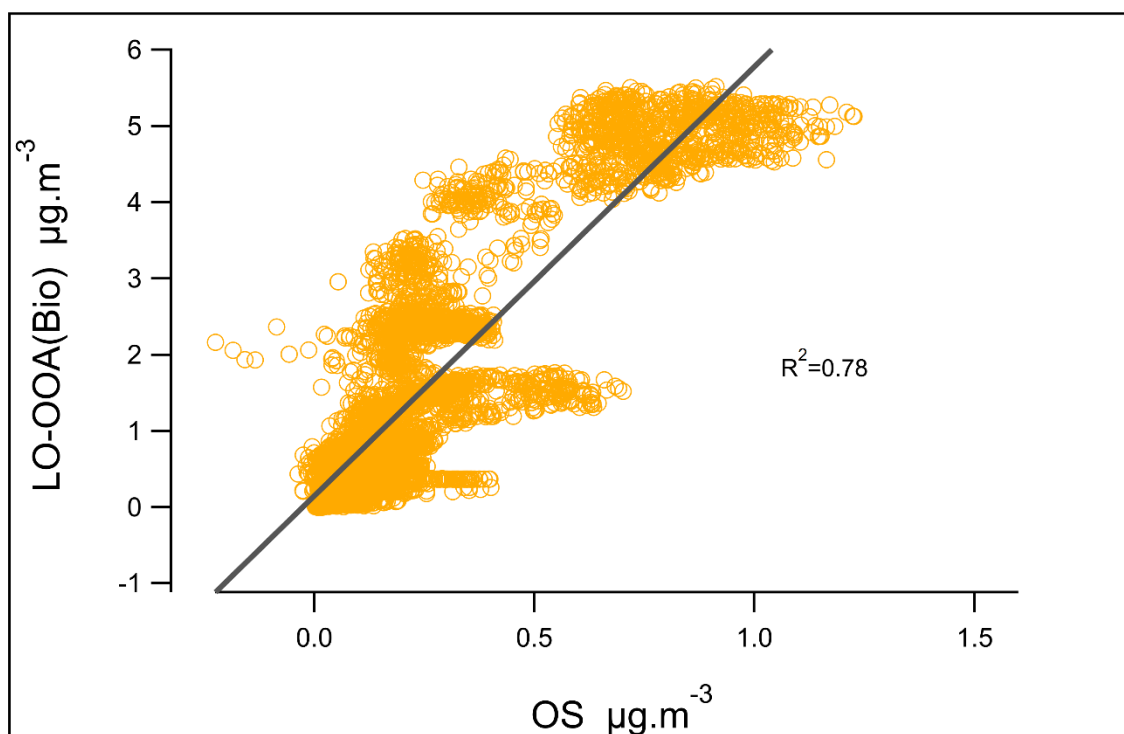

**Figure S2** The correlation between the mass concentration of biogenic derived OOA, LO-OOA(Bio), and the aerosol organosulfur calculated based on AMS measurements during summer (JULIAC-III) is displayed. The linear fitting and corresponding correlation efficiency was also marked in graph.

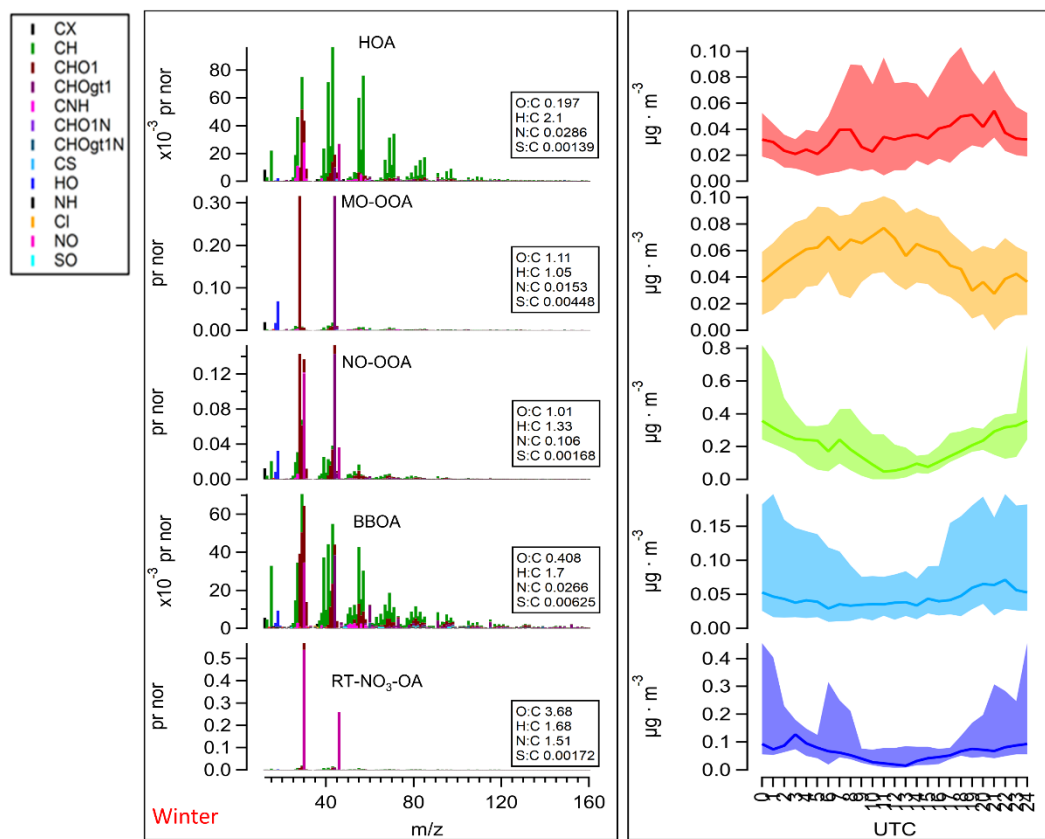

**Figure S3** The results overview of source apportionment resolved by PMF analysis of aerosol nitrate and organics for the winter of 2019. From left to right, the graph shows the variation of contribution to OA for each source factor, i.e. the high-resolution spectra of source factors colored by the family group of ions, and the diurnal pattern of the median (solid line) and interquartile range (IQR, shaded area) of the contribution of the corresponding source factor. The elemental ratio (OM:OC, O:C, H:C) of all OA factors is shown in the graph.

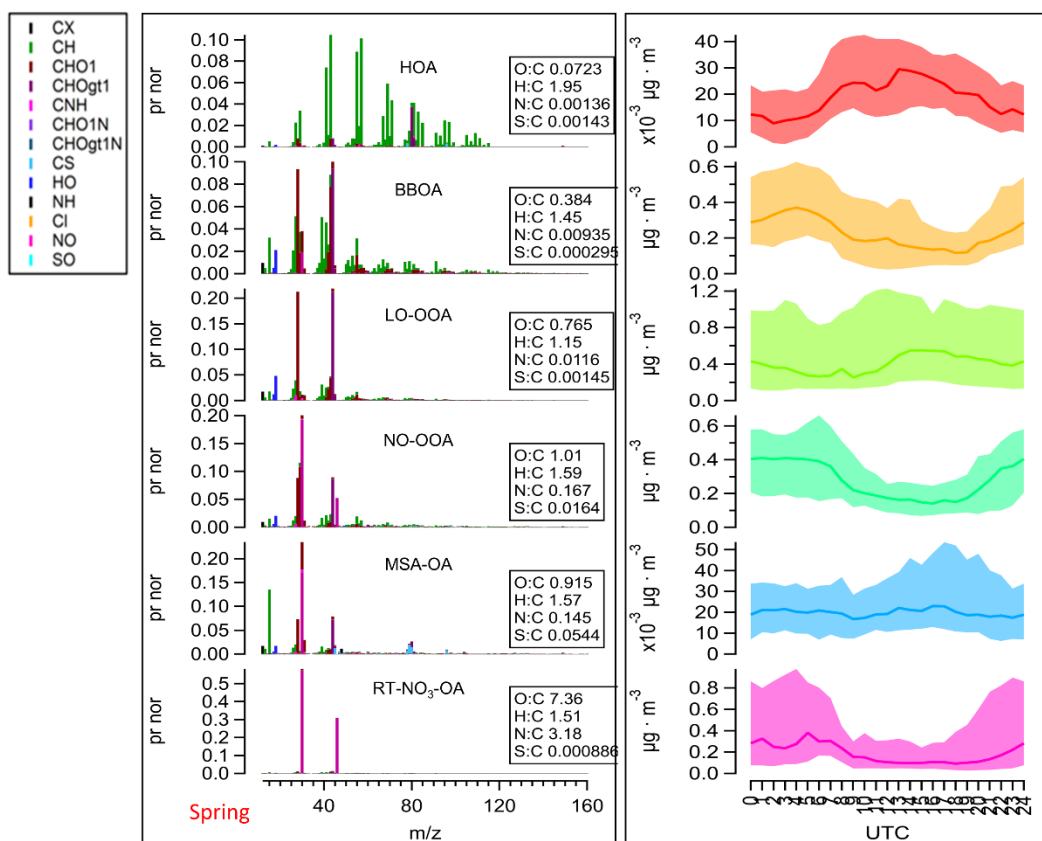

**Figure S4** The results overview of source apportionment resolved by PMF analysis of aerosol nitrate and organics for the spring of 2019. From left to right, the graph shows the variation of contribution to OA for each source factor, i.e. the high-resolution spectra of source factors colored by the family group of ions, and the diurnal pattern of the median (solid line) and interquartile range (IQR, shaded area) of the contribution of the corresponding source factor. The elemental ratio (OM:OC, O:C, H:C) of all OA factors is shown in the graph.

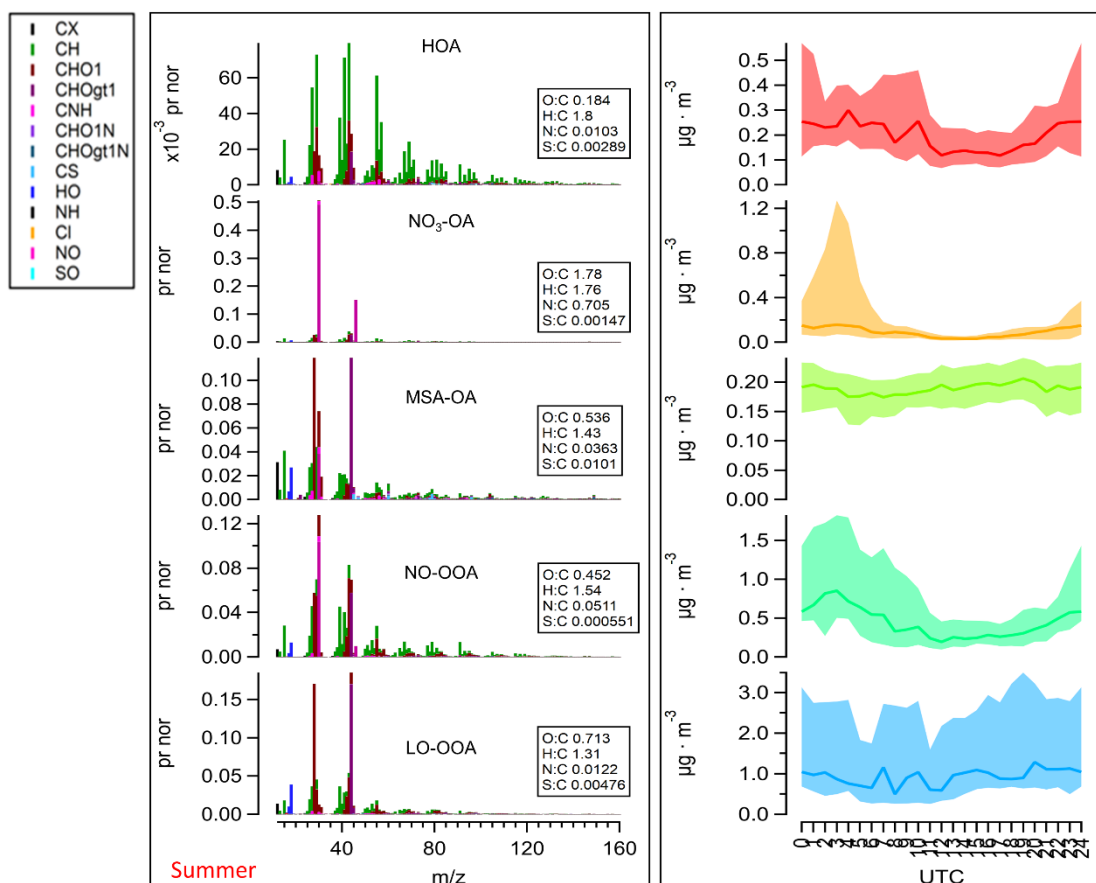

**Figure S5** The results overview of source apportionment resolved by PMF analysis of aerosol nitrate and organics for the summer of 2019. From left to right, the graph shows the variation of contribution to OA for each source factor, i.e. the high-resolution spectra of source factors colored by the family group of ions, and the diurnal pattern of the median (solid line) and interquartile range (IQR, shaded area) of the contribution of the corresponding source factor. The elemental ratio (OM:OC, O:C, H:C) of all OA factors is shown in the graph.

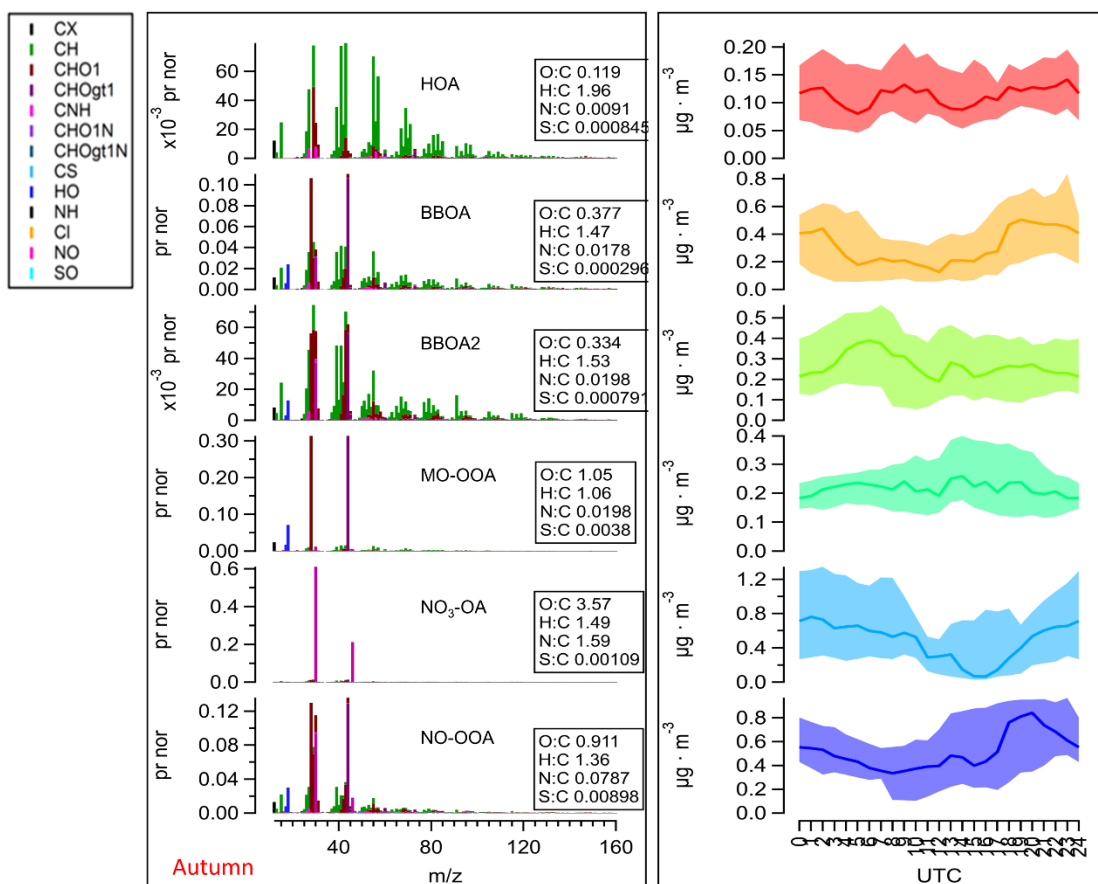

**Figure S6** The results overview of source apportionment resolved by PMF analysis of aerosol nitrate and organics for the autumn of 2019. From left to right, the graph shows the variation of contribution to OA for each source factor, i.e. the high-resolution spectra of source factors colored by the family group of ions, and the diurnal pattern of the median (solid line) and interquartile range (IQR, shaded area) of the contribution of the corresponding source factor. The elemental ratio (OM:OC, O:C, H:C) of all OA factors is shown in the graph.



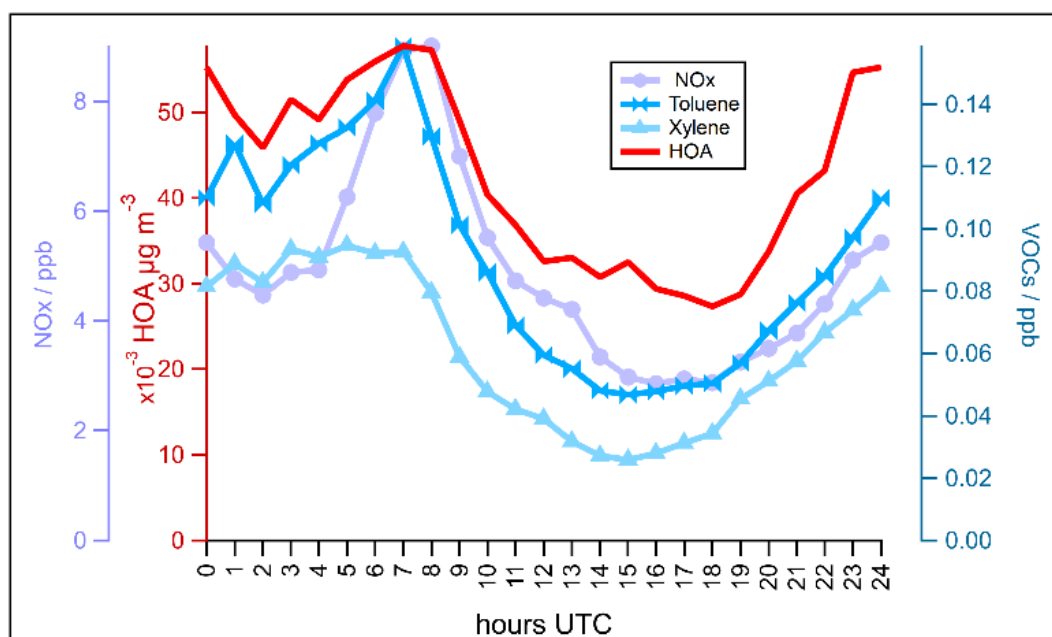

**Figure S6** Comparison of the diurnal variation of the OA contribution of the HOA factor, the concentration of NOx, toluene, and xylene during the JULIAC-II. Toluene and Xylene use the same y-axis named VOC.

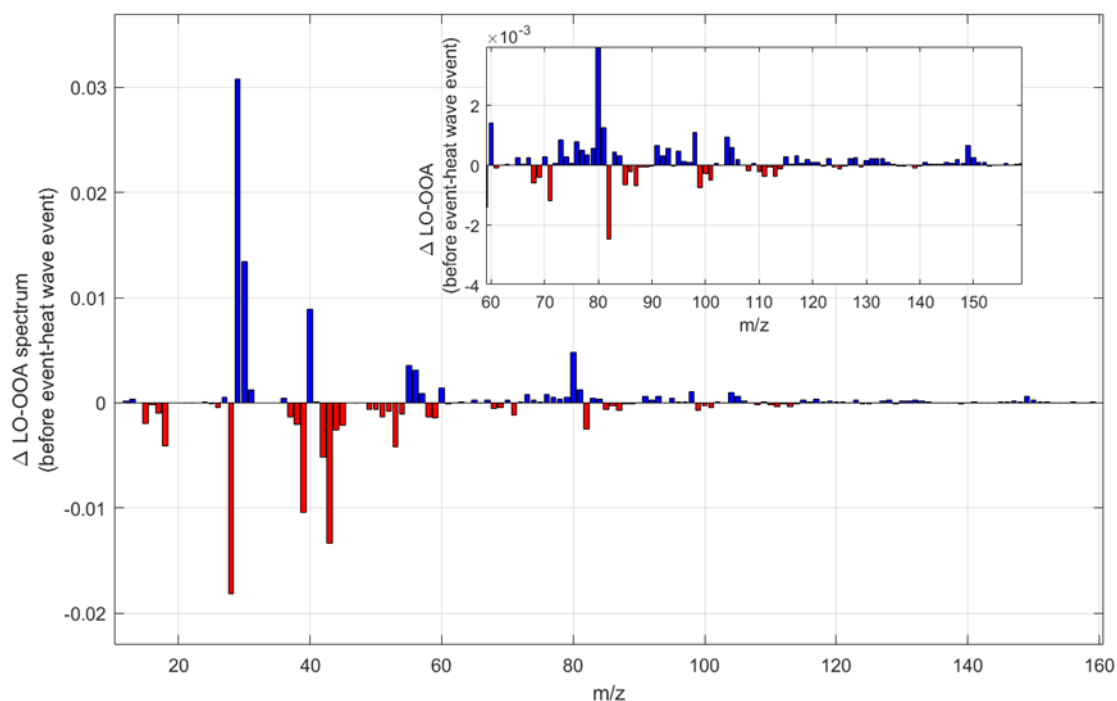

**Figure S7** The difference in factor spectrum of LO-OOA source before and during the heat wave event. The y-axis represents the difference of mass fraction of organic signal at each mass-to-charge ratio ( $m/z$ ) normalized to the total mass of OA. The insert window shows the detailed mass spectrum difference at regions of higher molecular weight with  $m/z > 60$ . The blue color bar shows the ion peaks, which have a higher intensity before the heat wave event, while the red color bar represents the ions enhanced during the haze event.

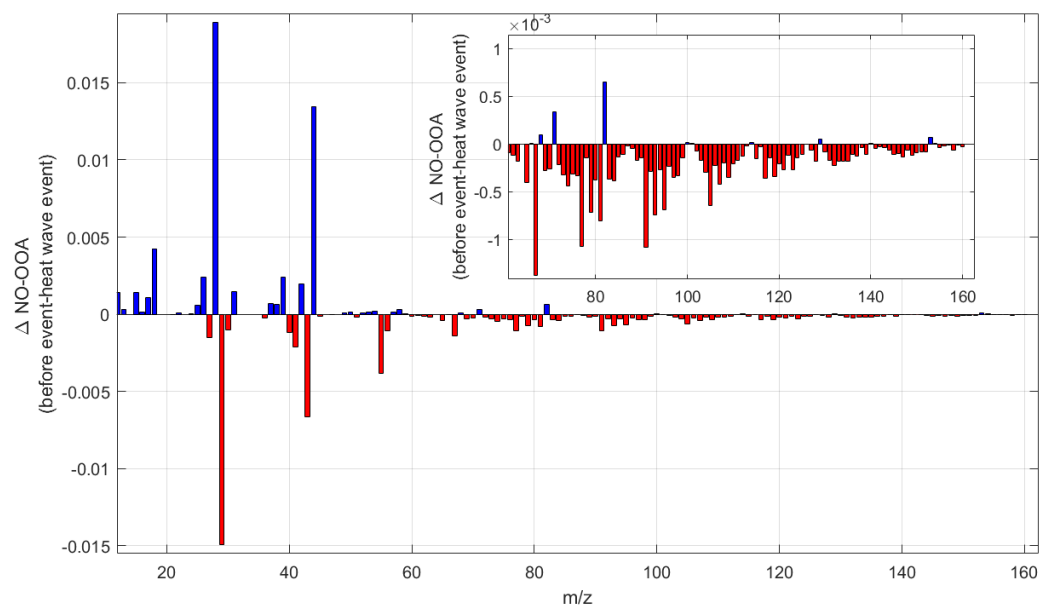

**Figure S8** The difference in factor spectrum of NO-OOA source before and during the heat wave event. The y-axis represents the difference of mass fraction of organic signal at each mass-to-charge ratio ( $m/z$ ) normalized to the total mass of OA. The insert window shows the detailed mass spectrum difference at regions of higher molecular weight with  $m/z > 60$ . The blue color bar shows the ion peaks, which have a higher intensity before the heat wave event, while the red color bar represents the ions enhanced during the haze event.

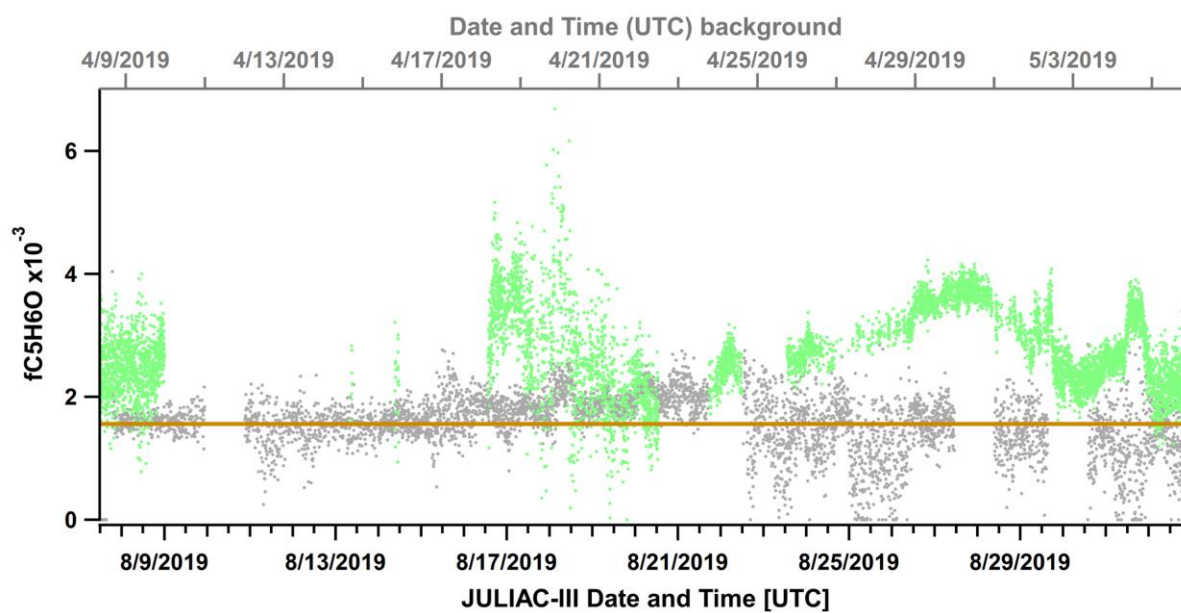

**Figure S9** Comparison of fraction of ion fragment  $C_5H_6O^+$  ( $fC_5H_6O^+$ ) to total OA during the summer (JULIAC-III, bottom X-axis, green dot) and during the spring (JULIAC-II, top x-axis, grey dot). Here the grey dots aims to represent the background level of  $fC_5H_6O^+$  when the secondary OA formation from biogenic emissions is not strong.

**Table S1:** The source factors and diagnostic parameters overview of the final selected optimal PMF run for all four JULIAC intensive phases. All source factors resolved in this study are displayed: Hydrocarbon-Like Organic Aerosol (HOA), Biomass Burning Organic Aerosol (BBOA), Less Oxidized Oxygenated Organic Aerosol (LO-OOA), More Oxidized Oxygenated Organic Aerosol (MO-OOA), Nocturnal Oxidation Oxygenated Organic Aerosol (NO-OOA), Methanesulfonic Acid-Containing Organic Aerosol (MSA-OA), Continental Regional Transport Organic Aerosol (Trans-OA).

| JULIAC Phases | Q/Qexp | UEV<br>(Unexplained noise+Unexplained real signals) | Resolved factors numbers | Resolved PMF factors                                     |
|---------------|--------|-----------------------------------------------------|--------------------------|----------------------------------------------------------|
| JULIAC-I      | 1.04   | 0.37 (0.29+0.08)                                    | 5                        | HOA, BBOA, Continental transport-OA, MO-OOA, NO-OOA      |
| JULIAC-II     | 1.03   | 0.31 (0.22+0.09)                                    | 6                        | HOA, BBOA, Trans-OA, Marine transprot-OA, LO-OOA, NO-OOA |
| JULIAC-III    | 3.20   | 0.28 (0.14+0.14)                                    | 4                        | HOA, Marine transprot-OA,, LO-OOA, NO-OOA                |
| JULIAC-IV     | 3.30   | 0.25 (0.11+0.14)                                    | 5                        | HOA, BBOA, BBOA2, MO-OOA, NO-OOA                         |

**Table S2:** Cross-correlation analysis ( $R^2$  and theta angle) of HOA spectrum among seasonal HOA resolved in four JULIAC phases and HOA factor reported in previous PMF studies (referred HOA factor data supported by high-resolution AMS spectral database, [High Resolution AMS Spectral Database \(colorado.edu\)](http://HighResolutionAMS.SpectralDatabase.colorado.edu)). The background colors of coefficient cell are color scales following the value of  $R^2$ .

| $R^2$ / Theta        | HOA_JULIAC-I  | HOA_JULIAC-II | HOA_JULIAC-III | HOA_JULIAC-IV | Reference             |
|----------------------|---------------|---------------|----------------|---------------|-----------------------|
| U DAURE BCN 2009_HOA | 0.81 / 23.71° | 0.99 / 12.80° | 0.98 / 12.80°  | 0.72 / 33.08° | (Mohr et al., 2012)   |
| A HR 031 HOA         | 0.82 / 23.93° | 0.83 / 24.02° | 0.82 / 24.02°  | 0.82 / 24.34° | (Crippa et al., 2013) |
| HOA_JULIAC-I         | 1.00 / 0°     | 0.83 / 21.97° | 0.85 / 21.97°  | 0.88 / 20.01° | JULIAC-I              |
| HOA_JULIAC-II        | 0.83 / 21.97° | 1.00 / 0°     | 0.99 / 0°      | 0.75 / 28.87° | JULIAC-II             |
| HOA_JULIAC-III       | 0.85 / 21.97° | 0.99 / 0°     | 1.00 / 0°      | 0.75 / 28.87° | JULIAC-III            |
| HOA_JULIAC-IV        | 0.88 / 20.01° | 0.75 / 28.87° | 0.75 / 28.87°  | 1.00 / 0°     | JULIAC-IV             |

**Table S3:** Cross-correlation analysis ( $R^2$  and theta angle) of BBOA spectrum among seasonal BBOA resolved in all four JULIAC phases and BBOA, CCOA factors reported in previous PMF studies (referred BBOA+CCOA factor data supported by high-resolution AMS spectral database, [High Resolution AMS Spectral Database \(colorado.edu\)](https://colorado.edu/high-resolution-ams-spectral-database)). The background colors of the coefficient cell are color scales following the value of  $R^2$ .

| $R^2$ / Theta         | BBOA<br>JULIAC-I | BBOA<br>JULIAC-II | BBOA<br>JULIAC-IV | BBOA2<br>JULIAC-IV | Reference           |
|-----------------------|------------------|-------------------|-------------------|--------------------|---------------------|
| U DAURE BCN 2009 BBOA | 0.44 / 46.80°    | 0.79 / 34.73°     | 0.26 / 56.13°     | 0.59 / 40.61°      | (Mohr et al., 2012) |
| A HR 052 BBOA         | 0.84 / 22.74°    | 0.76 / 27.92°     | 0.82 / 24.58°     | 0.94 / 14.23°      | (Hu et al., 2013)   |
| A HR 053 CCOA         | 0.64 / 34.92°    | 0.53 / 40.97°     | 0.92 / 16.23°     | 0.80 / 24.83°      | (Hu et al., 2013)   |
| BBOA JULIAC-I         | 1.00 / 0°        | 0.58 / 38.87°     | 0.63 / 36.32°     | 0.76 / 28.17°      | JULIAC-I            |
| BBOA JULIAC-II        | 0.58 / 38.87°    | 1.00 / 0°         | 0.49 / 43.83°     | 0.81 / 24.62°      | JULIAC-II           |
| BBOA JULIAC-IV        | 0.63 / 36.32°    | 0.49 / 43.83°     | 1.00 / 0°         | 0.81 / 24.79°      | JULIAC-IV           |
| BBOA2 JULIAC-IV       | 0.76 / 28.17°    | 0.81 / 24.62°     | 0.81 / 24.79°     | 1.00 / 0°          | JULIAC-IV           |

**Table S4:** Cross-correlation analysis ( $R^2$  and theta angle) of OOA spectrum among seasonal OOA resolved in all four JULIAC phases and OOA factors reported in previous PMF studies (referred OOA factor data supported by high-resolution AMS spectral database, [High Resolution AMS Spectral Database \(colorado.edu\)](https://hram.spectraldatabase.org/)). The background colors of coefficient cell are color scales following the value of  $R^2$ .

| $R^2$                      | MO-OOA<br>_JULIAC-I | LO-OOA<br>_JULIAC-II | LO-OOA<br>_JULIAC-III | MO-OOA<br>_JULIAC-IV | Reference             |
|----------------------------|---------------------|----------------------|-----------------------|----------------------|-----------------------|
| U_DAURE_BCN_2009_SV<br>OOA | 0.55 / 42.84°       | 0.64 / 37.43°        | 0.70 / 34.10°         | 0.57 / 42.11°        | (Mohr et al., 2012)   |
| A_HR_057_SV_OOA            | 0.88 / 20.62°       | 0.95 / 13.02°        | 0.97 / 9.43°          | 0.89 / 19.90°        | (Hu et al., 2013)     |
| A_HR_051_SVOOA_HR          | 0.63 / 37.46°       | 0.81 / 25.67°        | 0.85 / 23.89°         | 0.65 / 36.44°        | (Hayes et al., 2013)  |
| U_DAURE_BCN_2009_LV<br>OOA | 0.85 / 23.20°       | 0.92 / 17.59°        | 0.96 / 13.22°         | 0.85 / 22.99°        | (Mohr et al., 2012)   |
| A_HR_030_LV_OOA            | 0.82 / 26.12°       | 0.93 / 16.94°        | 0.97 / 12.49°         | 0.83 / 25.58°        | (Crippa et al., 2013) |
| A_HR_050_LVOOA_HR          | 0.90 / 18.42°       | 0.98 / 7.70°         | 0.98 / 10.74°         | 0.91 / 17.84°        | (Hayes et al., 2013)  |
| A_HR_058_LV_OOA            | 0.93 / 15.72°       | 0.98 / 8.80°         | 0.99 / 5.90°          | 0.93 / 15.24°        | (Hu et al., 2013)     |
| A_HR_029_MOA               | 0.30 / 55.34°       | 0.38 / 49.96°        | 0.50 / 42.98°         | 0.31 / 54.95°        | (Crippa et al., 2013) |
| A_HR_070_MO_OOA            | 0.85 / 22.93°       | 0.94 / 14.48°        | 0.97 / 10.03°         | 0.86 / 22.59°        | (Hu et al., 2015)     |
| A_HR_049_LOA_HR            | 0.59 / 39.76°       | 0.71 / 32.00°        | 0.74 / 30.65°         | 0.61 / 38.88°        | (Hayes et al., 2013)  |
| A_HR_071_LO_OOA            | 0.46 / 47.32°       | 0.63 / 36.66°        | 0.72 / 31.56°         | 0.47 / 46.57°        | (Hu et al., 2015)     |
| A_HR_072_LO_OOA            | 0.39 / 51.19°       | 0.58 / 39.88°        | 0.66 / 35.05°         | 0.40 / 50.35°        | (Hu et al., 2015)     |
| MO_OOA_JULIAC-I            | 1.00 / 0°           | 0.95 / 13.30°        | 0.91 / 17.82°         | 1.00 / 1.72°         | JULIAC-I              |
| LO_OOA_JULIAC-II           | 0.95 / 13.30°       | 1.00 / 0°            | 0.98 / 8.42°          | 0.95 / 12.53°        | JULIAC-II             |
| LO_OOA_JULIAC-III          | 0.91 / 17.82°       | 0.98 / 8.42°         | 1.00 / 0°             | 0.91 / 17.16°        | JULIAC-III            |
| MO_OOA_JULIAC-IV           | 1.00 / 1.72°        | 0.95 / 12.53°        | 0.91 / 17.16°         | 1.00 / 0°            | JULIAC-IV             |



**Table S5:** Overview of the averaged elemental ratio O:C, H:C, OSc with corresponding standard variation of total organic aerosol for all four JULIAC intensive phases.

| Averaged<br>elemental ratio | JULIAC campaign     |                      |                       |                      |
|-----------------------------|---------------------|----------------------|-----------------------|----------------------|
|                             | JULIAC-<br>I/Winter | JULIAC-<br>II/Spring | JULIAC-<br>III/summer | JULIAC-<br>IV/autumn |
| O:C                         | 0.71±0.20           | 0.76±0.12            | 0.64±0.08             | 0.66±0.09            |
| H:C                         | 1.63±0.11           | 1.50±0.10            | 1.50±0.08             | 1.50±0.06            |
| OSc                         | -0.21±0.41          | 0.01±0.26            | -0.23±0.23            | -0.18±0.23           |

**Table S6:** Correlation coefficient among the mass variation of biogenic-derived SOA (LO-OOA(Bio)), aerosol organo-sulfur (OS), and aerosol bulk species (nitrate, sulfate and sulfate).

| R                 | Total<br>conc | volume | Total<br>conc | surface | Total number conc |
|-------------------|---------------|--------|---------------|---------|-------------------|
| LO-<br>OOA(Bio)   | 0.86          |        | 0.80          |         | 0.29              |
| OS                | 0.84          |        | 0.80          |         | 0.33              |
| HRSO <sub>4</sub> | 0.85          |        | 0.81          |         | 0.35              |
| HROrg             | 0.86          |        | 0.82          |         | 0.37              |
| HRNO <sub>3</sub> | 0.35          |        | 0.37          |         | 0.29              |

## Reference

- Crippa, M., El Haddad, I., Slowik, J. G., DeCarlo, P. F., Mohr, C., Heringa, M. F., Prévôt, A. S. H.: Identification of marine and continental aerosol sources in Paris using high resolution aerosol mass spectrometry, *Journal of Geophysical Research: Atmospheres*, 118, 1950-1963, <https://doi.org/10.1002/jgrd.50151>, 2013.
- Hayes, P. L., Ortega, A. M., Cubison, M. J., Froyd, K. D., Zhao, Y., Cliff, S. S., Jimenez, J. L.: Organic aerosol composition and sources in Pasadena, California, during the 2010 CalNex campaign, *Journal of Geophysical Research: Atmospheres*, 118, 9233-9257, <https://doi.org/10.1002/jgrd.50530>, 2013.
- Hu, W. W., Hu, M., Yuan, B., Jimenez, J. L., Tang, Q., Peng, J. F., He, L. Y.: Insights on organic aerosol aging and the influence of coal combustion at a regional receptor site of central eastern China, *Atmos. Chem. Phys.*, 13, 10095-10112, <https://doi.org/10.5194/acp-13-10095-2013>, 2013.
- Hu, W. W., Campuzano-Jost, P., Palm, B. B., Day, D. A., Ortega, A. M., Hayes, P. L., Jimenez, J. L.: Characterization of a real-time tracer for isoprene epoxydiols-derived secondary organic aerosol (IEPOX-SOA) from aerosol mass spectrometer measurements, *Atmos Chem Phys*, 15, 11807-11833, <https://doi.org/10.5194/acp-15-11807-2015>, 2015.
- Mohr, C., DeCarlo, P. F., Heringa, M. F., Chirico, R., Slowik, J. G., Richter, R., Prévôt, A. S. H.: Identification and quantification of organic aerosol from cooking and other sources in Barcelona using aerosol mass spectrometer data, *Atmos Chem Phys*, 12, 1649-1665, <https://doi.org/10.5194/acp-12-1649-2012>, 2012.
